# Supplementary material for: Rotavirus Seasonality and Age Effects in a Birth Cohort Study of Southern India
Source: PLoS One. 2013 Aug 16;8(8):e71616. doi: 10.1371/journal.pone.0071616 (PMC3745434; doi:10.1371/journal.pone.0071616)
Supplement: Dataset S1 — Time series of selected variables presented in the study. (XLS) [file pone.0071616.s001.xls]

## Sheet: rv_seasonality_datset
Week Number	Chid-weeks of follow up	Median age of children	Weekly counts of rotavirus diarrhea	Weekly incidence of rotavirus diarrhea (per 1000)
10	1.71429	0.5	0	0
11	2	1.42857	0	0
12	2.85714	2.21429	0	0
13	3.85714	2.85714	0	0
14	6	1.92857	0	0
15	12.4286	1	0	0
16	20.4286	1.28571	0	0
17	21.8571	2.28571	0	0
18	24.4286	3	1	40.9357
19	29.5714	3.71429	0	0
20	35.2857	4.42857	1	28.3401
21	38.1429	5.14286	0	0
22	41.2857	5	0	0
23	47	5	0	0
24	52	5.57143	0	0
25	60.4286	5.71429	1	16.5485
26	66.4286	6	1	15.0538
27	73.2857	5.57143	1	13.6452
28	77.8571	6.14286	0	0
29	79.7143	7	1	12.5448
30	87	7.28571	1	11.4943
31	91.8571	7.85714	1	10.8865
32	94.1429	8.57143	1	10.6222
33	97.8571	9	1	10.219
34	104	9.5	0	0
35	108.857	10.2857	1	9.18635
36	115.143	11	0	0
37	121	11.7143	2	16.5289
38	125.571	12.2857	0	0
39	128.571	12.8571	1	7.77778
40	132.571	13.2857	1	7.5431
41	142.857	13.2143	0	0
42	152.429	12.7143	1	6.56045
43	160.286	13.2857	1	6.23886
44	170.714	13.2857	1	5.85774
45	182.714	12.1429	0	0
46	193.143	12.2857	4	20.7101
47	201.857	12.1429	2	9.908
48	211	12.5714	3	14.218
49	216.571	13	2	9.23483
50	223.571	13.4286	4	17.8914
51	231.857	13.5714	2	8.626
52	235.286	14	3	12.7505
53	240.571	14.2857	2	8.31354
54	251.429	14.2143	7	27.8409
55	260.143	14.5714	5	19.2202
56	266.857	15.2857	5	18.7366
57	272.143	16	3	11.0236
58	277	16.7143	5	18.0505
59	282.429	17.4286	5	17.7036
60	288.714	18.1429	5	17.3182
61	297.429	18.7143	4	13.4486
62	303.429	19.2857	2	6.59134
63	309.714	19.8571	4	12.9151
64	318.429	20.5714	3	9.42127
65	324.857	21.2857	4	12.3131
66	330.857	21.8571	3	9.06736
67	337.714	22.4286	3	8.88325
68	347.571	23.1429	2	5.75421
69	352.429	23.8571	1	2.83745
70	356.143	24.5714	1	2.80786
71	359.857	25.2857	3	8.33664
72	362.429	26	1	2.75916
73	366.714	26.7143	11	29.9961
74	369	27.5714	6	16.2602
75	372.714	28.4286	4	10.7321
76	376.143	29.1429	1	2.65856
77	377.286	30.1429	1	2.65051
78	382	30.8571	1	2.6178
79	385.286	31.7143	2	5.19095
80	389.429	32.5	4	10.2715
81	396.429	32.8571	3	7.56757
82	401.143	33.2143	7	17.4501
83	402.143	34.1429	2	4.97336
84	403.714	34.8571	2	4.954
85	402.286	36.0714	3	7.45739
86	402	37.1429	4	9.95025
87	400.286	38.2857	1	2.49822
88	399	39.2857	0	0
89	398.714	40.1429	1	2.50806
90	397.571	41.1429	1	2.51527
91	396.429	42.1429	3	7.56757
92	395.714	43.1429	1	2.52708
93	395	44.2857	1	2.53165
94	394.429	45.2857	2	5.07063
95	394	46.2857	1	2.53807
96	393	47.4286	3	7.63359
97	393	48.4286	0	0
98	392.857	49.4286	1	2.54545
99	392	50.2857	1	2.55102
100	392	51.2857	1	2.55102
101	391.857	52.2857	0	0
102	390.429	53.2857	0	0
103	390	54.2857	3	7.69231
104	390	55.2857	5	12.8205
105	390	56.2857	0	0
106	390	57.2857	3	7.69231
107	390	58.2857	3	7.69231
108	389.429	59.2857	3	7.7036
109	389	60.2857	3	7.71208
110	389	61.2857	2	5.14139
111	388.286	62.2857	1	2.57542
112	388	63.2857	3	7.73196
113	387.143	64.4286	2	5.16605
114	387	65.4286	2	5.16796
115	387	66.4286	2	5.16796
116	386.714	67.4286	4	10.3436
117	386	68.5714	1	2.59067
118	386	69.5714	0	0
119	385.429	70.5714	1	2.59451
120	385	71.7143	0	0
121	385	72.7143	0	0
122	385	73.7143	1	2.5974
123	385	74.7143	3	7.79221
124	385	75.7143	1	2.5974
125	385	76.7143	2	5.19481
126	385	77.7143	0	0
127	384.143	78.7143	3	7.80959
128	383	79.8571	0	0
129	382.714	80.8571	4	10.4517
130	382	82	0	0
131	382	83	2	5.2356
132	382	84	1	2.6178
133	382	85	1	2.6178
134	382	86	1	2.6178
135	381	87	0	0
136	381	88	0	0
137	381	89	1	2.62467
138	381	90	0	0
139	381	91	0	0
140	381	92	1	2.62467
141	381	93	3	7.87402
142	381	94	2	5.24934
143	381	95	0	0
144	381	96	1	2.62467
145	381	97	1	2.62467
146	381	98	1	2.62467
147	381	99	1	2.62467
148	381	100	2	5.24934
149	381	101	0	0
150	381	102	2	5.24934
151	381	103	2	5.24934
152	381	104	2	5.24934
153	381	105	3	7.87402
154	381	106	0	0
155	381	107	2	5.24934
156	381	108	0	0
157	381	109	0	0
158	381	110	1	2.62467
159	381	111	0	0
160	381	112	0	0
161	381	113	0	0
162	381	114	1	2.62467
163	381	115	2	5.24934
164	381	116	2	5.24934
165	380.143	117	1	2.63059
166	379	117.857	1	2.63852
167	379	118.857	1	2.63852
168	379	119.857	0	0
169	379	120.857	0	0
170	379	121.857	0	0
171	379	122.857	0	0
172	379	123.857	2	5.27704
173	379	124.857	0	0
174	378.857	125.857	0	0
175	378	127	1	2.6455
176	378	128	0	0
177	378	129	0	0
178	378	130	2	5.29101
179	377.429	130.857	2	5.29902
180	376.857	131.857	1	2.65353
181	375.286	132.714	0	0
182	374.714	133.714	4	10.6748
183	374	134.786	2	5.34759
184	374	135.786	1	2.6738
185	373	136.857	0	0
186	373	137.857	2	5.36193
187	373	138.857	0	0
188	373	139.857	0	0
189	373	140.857	0	0
190	373	141.857	1	2.68097
191	372.571	142.857	0	0
192	372	143.786	0	0
193	371.571	144.714	1	2.69127
194	370.429	145.714	0	0
195	370	146.786	0	0
196	370	147.786	1	2.7027
197	370	148.786	0	0
198	370	149.786	1	2.7027
199	370	150.786	2	5.40541
200	370	151.786	1	2.7027
201	370	152.786	0	0
202	370	153.786	0	0
203	370	154.786	0	0
204	369.571	155.714	2	5.41167
205	367.429	156.429	0	0
206	352.857	156.143	0	0
207	344.429	156.714	0	0
208	340.714	157.571	0	0
209	339	158.571	1	2.94985
210	338.714	159.429	0	0
211	337.857	160.429	0	0
212	336	161.286	0	0
213	332.286	162.071	0	0
214	331	163	0	0
215	331	164	0	0
216	330.857	165	0	0
217	330	166	0	0
218	330	167	0	0
219	329.714	168.071	0	0
220	328.429	169.143	0	0
221	328	170.143	0	0
222	328	171.143	0	0
223	328	172.143	0	0
224	328	173.143	0	0
225	328	174.143	0	0
226	325.143	175.357	0	0
227	322.429	176.286	0	0
228	321.429	177.286	0	0
229	320.857	178.214	0	0
230	317.857	179.143	0	0
231	314.714	180.286	0	0
232	313.143	181.357	0	0
233	310.429	182.286	0	0
234	306.429	183.429	0	0
235	296.857	184.143	0	0
236	294.143	185.143	0	0
237	292.286	186	0	0
238	292	187	0	0
239	292	188	0	0
240	292	189	0	0
241	290.571	190	0	0
242	288	191.214	0	0
243	205.714	192.071	0	0
